# Supplementary material for: MindSpot Clinic: An Accessible, Efficient, and Effective Online Treatment Service for Anxiety and Depression
Source: Atypon-hosted journal article supplement (doi:10.1176/appi.ps.201400477), 2015-07-01
Supplement: appi.ps.201400477.ds001.pdf [file appi.ps.201400477.ds001.pdf]

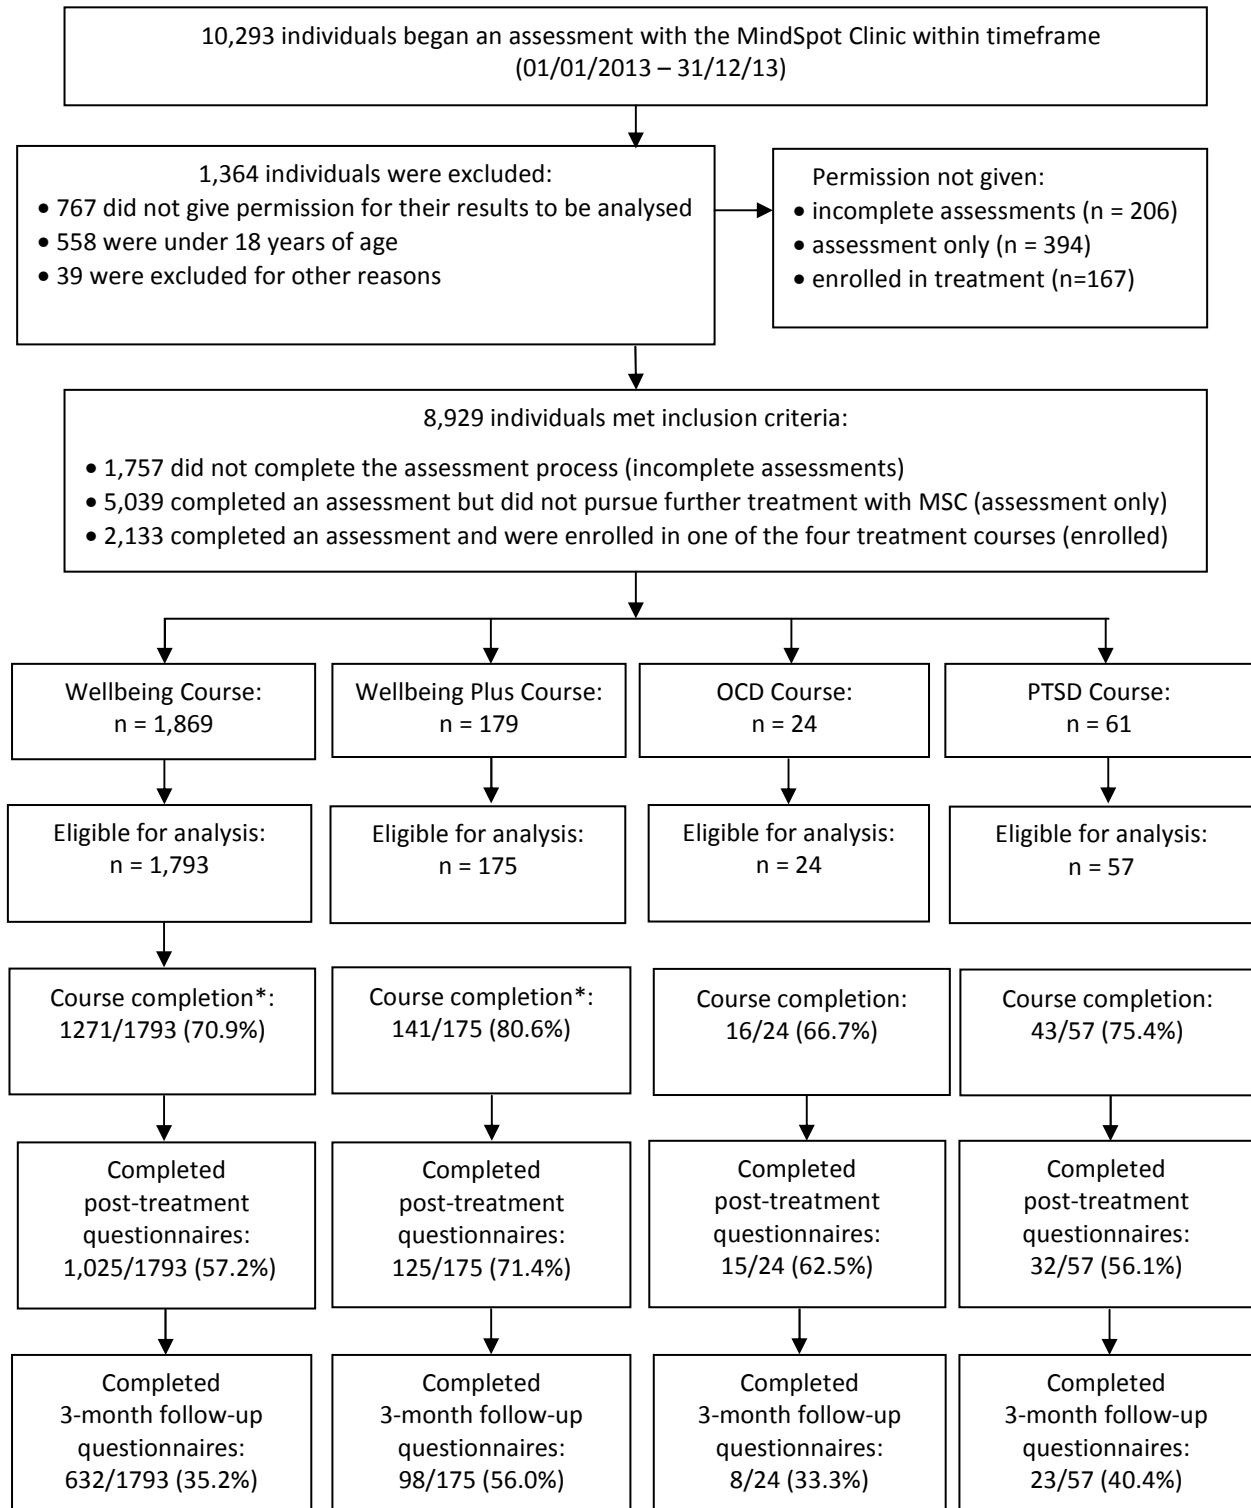

\* Data not available for 2 participants in the Wellbeing Course and 5 participants in the Wellbeing Plus Course, as the courses were completed by mail.
